# Supplementary material
Source: Royal Society of Chemistry journal article supplement (doi:10.1039/d6dt00231e)
Supplement: d6dt00231e1.pdf [file d6dt00231e1.pdf]

## Supporting Information

### A Novel Green-Emitting Phosphor $\text{NaLa}_9\text{Ge}_6\text{O}_{26}:\text{xTb}^{3+}$ with Anti-Thermal Quenching for WLEDs

Zhenwei Jia<sup>1</sup>, Yijie Ren<sup>1</sup>, Mengdi Yue<sup>1</sup>, Jiaqi Wang<sup>1</sup>, Jing Meng<sup>1</sup>, Li Wu<sup>1\*</sup>, Yongfa Kong<sup>1</sup> and Jingjun Xu<sup>1</sup>

<sup>1</sup>Key Laboratory of Weak-Light Nonlinear Photonics, Ministry of Education, School of Physics, Nankai University, Tianjin 300071, China.

\*E-mail: lwu@nankai.edu.cn

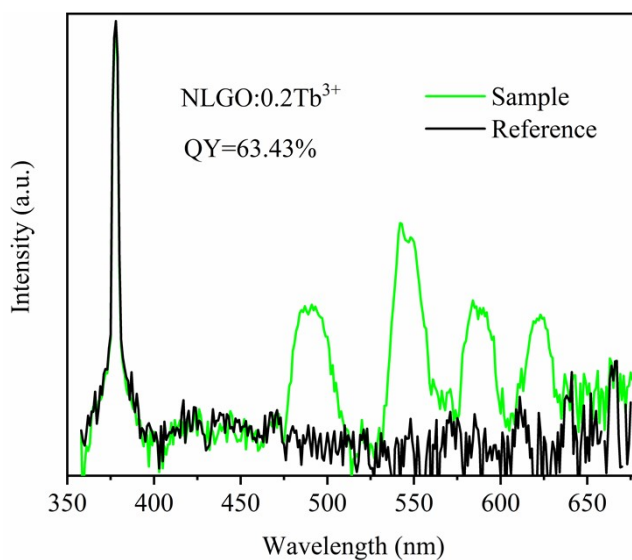

Fig. S1. PLQY of NLGO:0.2Tb<sup>3+</sup>.

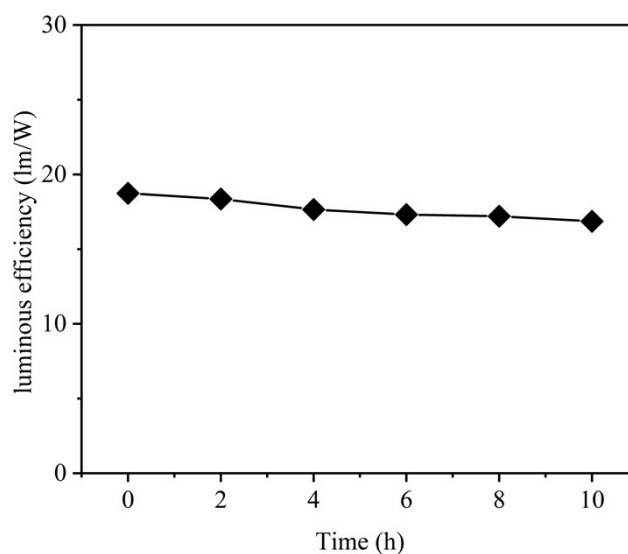

Fig. S2. Luminous efficiency of the device operated from 0 to 10 h.

Table S1. Lattice parameters and agreement factors for NLGO:0.2Tb<sup>3+</sup> refined by Rietveld method.

| Formula                  | NLGO      | NLGO:0.2Tb <sup>3+</sup> |
|--------------------------|-----------|--------------------------|
| Crystal system           | Hexagonal | Hexagonal                |
| Space group              | P63/m     | P63/m                    |
| a=b (Å)                  | 9.883(2)  | 9.832(4)                 |
| c (Å)                    | 7.267(3)  | 7.124(13)                |
| Z                        | 1         | 1                        |
| Volume (Å <sup>3</sup> ) | 614.7     | 596.4(4)                 |
| $R_p$                    | /         | 8.76                     |
| $R_{exp}$                | /         | 5.92                     |
| GOF                      | /         | 2.06                     |

Table S2. Atomic positions and occupancies for NLGO:0.2Tb<sup>3+</sup> refined by Rietveld method.

|     | Np | x         | y        | z      | Occupancy |
|-----|----|-----------|----------|--------|-----------|
| La1 | 12 | 0.3333    | 0.6667   | 0.0003 | 0.75      |
| Na1 | 12 | 0.3333    | 0.6667   | 0.0003 | 0.25      |
| La2 | 6  | 0.2500(5) | 0.000(3) | 0.2500 | 0.819(3)  |

|     |    |            |            |           |          |
|-----|----|------------|------------|-----------|----------|
| Tb  |    |            |            |           | 0.181(3) |
| Ge1 | 6  | 0.3700(16) | 0.3800(15) | 0.2500    | 1.0      |
| O1  | 6  | 0.0000(4)  | 0.4000(7)  | 0.2500    | 1.0      |
| O2  | 6  | 0.0000(2)  | 0.3000(2)  | 0.7500    | 1.0      |
| O3  | 12 | 0.3000(8)  | 0.3000(2)  | 0.5000(9) | 1.0      |
| O4  | 2  | 0.0000     | 0.0000     | 0.2500    | 1.0      |

Table S3. QY of Tb<sup>3+</sup> ions in NLGO and other compounds.

| Compound                                                                                    | QY     | Refs      |
|---------------------------------------------------------------------------------------------|--------|-----------|
| SrMg <sub>1.06</sub> Al <sub>9.94</sub> O <sub>17</sub> :Tb <sup>3+</sup> ,Ce <sup>3+</sup> | 55.14% | 1         |
| Lu <sub>2</sub> (MoO <sub>4</sub> ) <sub>3</sub> :Tb <sup>3+</sup>                          | 43.79% | 2         |
| Ca <sub>2</sub> ZrSi <sub>4</sub> O <sub>12</sub> :Tb <sup>3+</sup> ,Ce <sup>3+</sup>       | 59.20% | 3         |
| NLGO:Tb <sup>3+</sup>                                                                       | 63.43% | This work |

Table S4. The CCT,  $R_a$ , CIE chromaticity coordinates, and luminous efficiency under different currents (25-300 mA) for the fabricated WLED.

| Current (mA) | CIE (x,y)        | CCT  | $R_a$ | lm/W  |
|--------------|------------------|------|-------|-------|
| 25           | (0.3381, 0.3209) | 5209 | 84.7  | 26.27 |
| 50           | (0.3383, 0.3210) | 5196 | 84.6  | 25.44 |
| 75           | (0.3381, 0.3207) | 5203 | 84.5  | 24.58 |
| 100          | (0.3381, 0.3204) | 5206 | 84.6  | 23.74 |
| 125          | (0.3380, 0.3203) | 5209 | 84.6  | 22.96 |
| 150          | (0.3380, 0.3203) | 5211 | 84.6  | 22.1  |
| 175          | (0.3379, 0.3202) | 5216 | 84.7  | 21.55 |
| 200          | (0.3379, 0.3210) | 5216 | 84.6  | 20.82 |
| 225          | (0.3379, 0.3202) | 5213 | 84.7  | 20.37 |
| 250          | (0.3380, 0.3201) | 5209 | 84.7  | 19.68 |
| 275          | (0.3379, 0.3202) | 5213 | 84.8  | 19.15 |
| 300          | (0.3379, 0.3202) | 5216 | 84.9  | 18.8  |

## Notes and references

1. C. Shan, Q. Wang, P. Xue, L. Tian, Enhancement of luminescence, thermal stability and quantum efficiency with Ce<sup>3+</sup> co-doped SrMg<sub>1.06</sub>Al<sub>9.94</sub>O<sub>17</sub>:Tb<sup>3+</sup> phosphor, *Helvion*, 2023, **9**(3), e14492
2. N. Huang, G. Lu, B. Bai, H. Zhao, W. Yao, C. Cao, Y. Li, A. Xie, Preparation, crystal structure, and photoluminescence properties of Tb<sup>3+</sup> activated Lu<sub>2</sub>(MoO<sub>4</sub>)<sub>3</sub> green-emitting phosphors, *J. Lumin.* 2024, **269**, 120475.
3. Y. Gao, R.H. Cong, T. Yang, Color-tunable emissions realized by Tb<sup>3+</sup> to Eu<sup>3+</sup> energy transfer in ZnGdB<sub>5</sub>O<sub>10</sub> under near-UV excitation, *Dalton Trans.* 2023, **52**(35), 12332.
