# Supplementary material
Source: Royal Society of Chemistry journal article supplement (doi:10.1039/d6dt00231e)

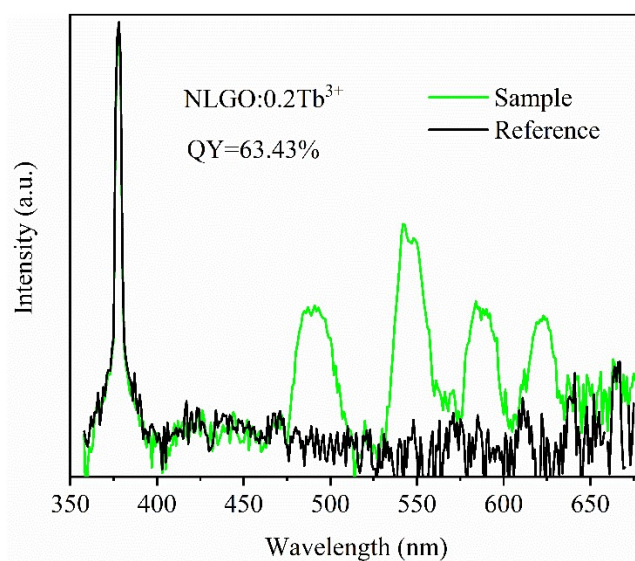

Fig. S1. PLQY of NLGO:0.2Tb<sup>3+</sup>.

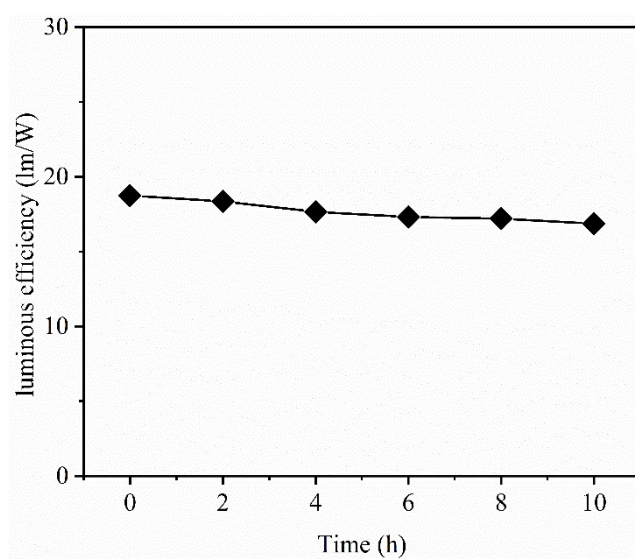

Fig. S2. Luminous efficiency of the device operated from 0 to 10 h.

Supplement: d6dt00231e2.pdf [file d6dt00231e2.pdf]
